# Supplementary material for: Unravelling the nanoscale mechanism of polarization reversal in a Hf0.5Zr0.5O2-based ferroelectric capacitor by vector piezoresponse force microscopy
Source: Royal Society of Chemistry journal article supplement (doi:10.1039/d4nr01124d), 2024-01-01
Supplement: d4nr01124d1.pdf [file d4nr01124d1.pdf]

## Supporting Information

### Unravelling the nanoscale mechanism of polarization reversal in a $\text{Hf}_{0.5}\text{Zr}_{0.5}\text{O}_2$ -based ferroelectric capacitor by vector piezoresponse force microscopy

Anastasia Chouprik\* and Maxim Spiridonov

#### S1. z-PFM for the rotated sample

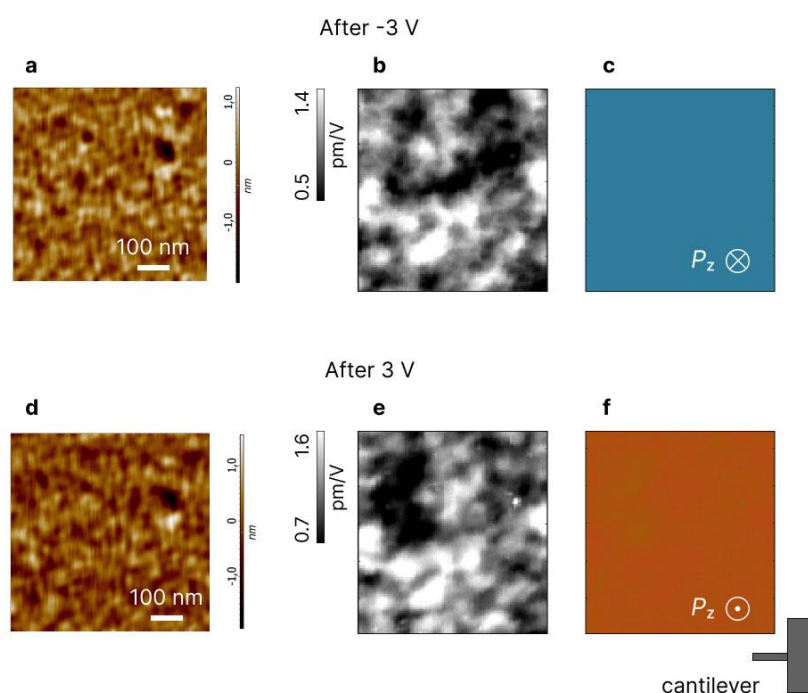

**Figure S1.** z-PFM for the rotated HZO sample after polarization switching to the downward and upward states. (a) and (d) Topography of the top TiN electrode in the studied area. (b) and (e) PFM amplitude maps. (c) and (f) PFM phase maps.
